# Supplementary material for: Intracellular Cryptococcus neoformans disrupts the transcriptome profile of M1- and M2-polarized host macrophages
Source: PubMed Central journal article supplement (PMC7454990; doi:10.1371/journal.pone.0233818), 2020-08-28
Supplement: pone.0233818.s004.pdf [file pone.0233818.s004.pdf]

# Uncropped images of the blots presented in the main figures

**Fig. 1**

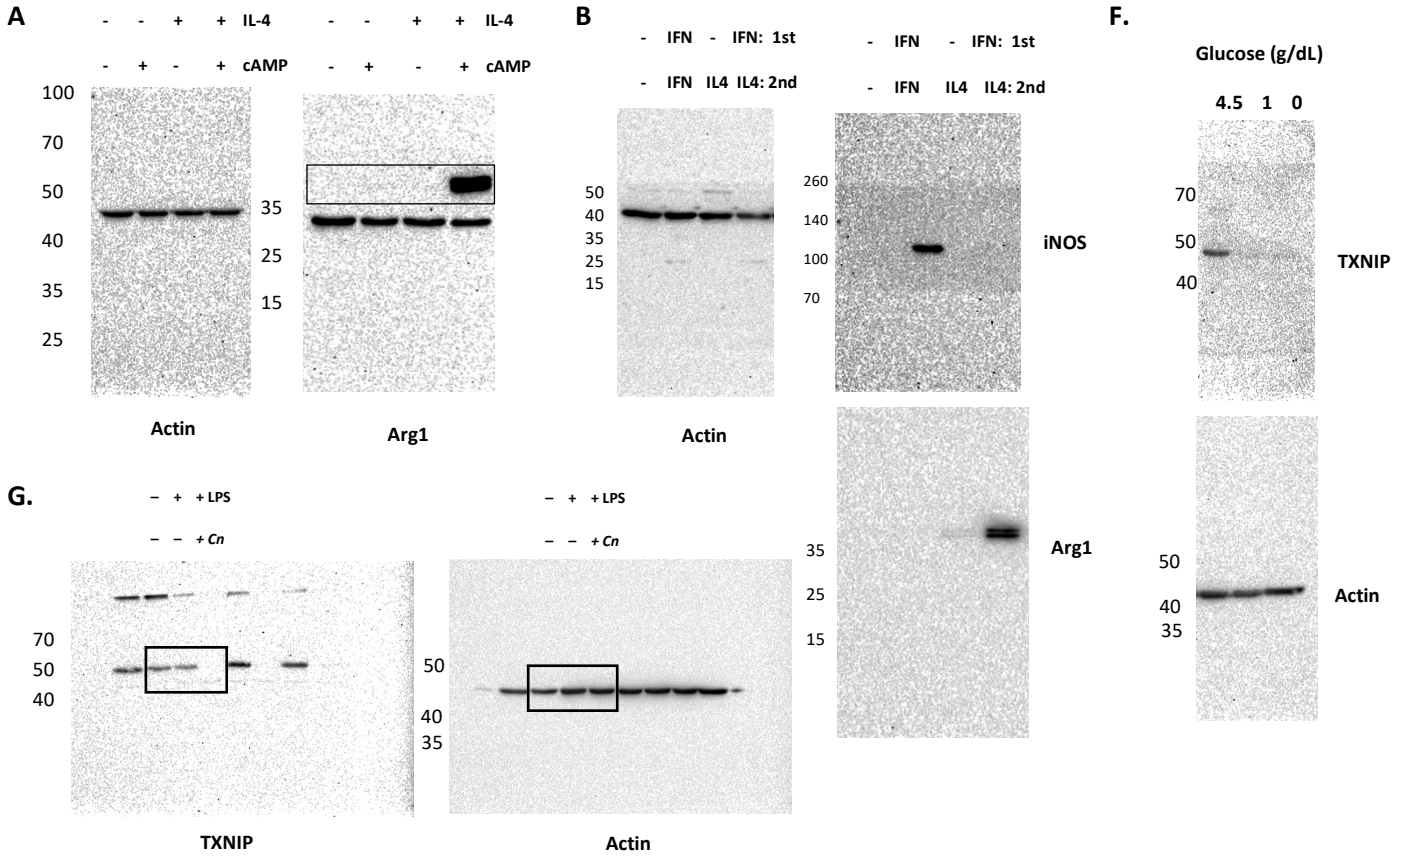

**Fig.2**

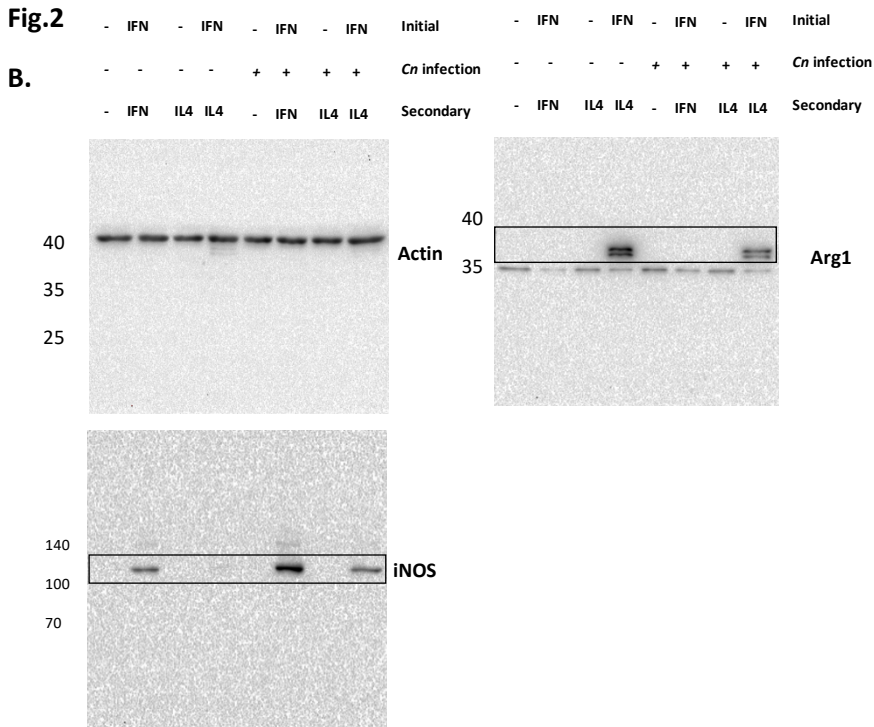

**Fig. 5**

**A**

|   |     |     |     |   |     |     |     |                     |   |     |     |     |   |     |         |     |                     |
|---|-----|-----|-----|---|-----|-----|-----|---------------------|---|-----|-----|-----|---|-----|---------|-----|---------------------|
| - | IFN | -   | IFN | - | IFN | -   | IFN | Initial             | - | IFN | -   | IFN | - | IFN | Initial |     |                     |
| - | -   | -   | -   | + | +   | +   | +   | <i>Cn</i> infection | - | -   | -   | -   | + | +   | +       | +   | <i>Cn</i> infection |
| - | IFN | IL4 | IL4 | - | IFN | IL4 | IL4 | Secondary           | - | IFN | IL4 | IL4 | - | IFN | IL4     | IL4 | Secondary           |

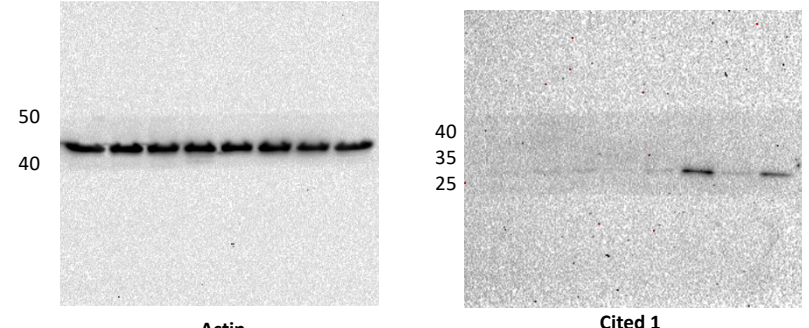

**Actin**

**Cited 1**

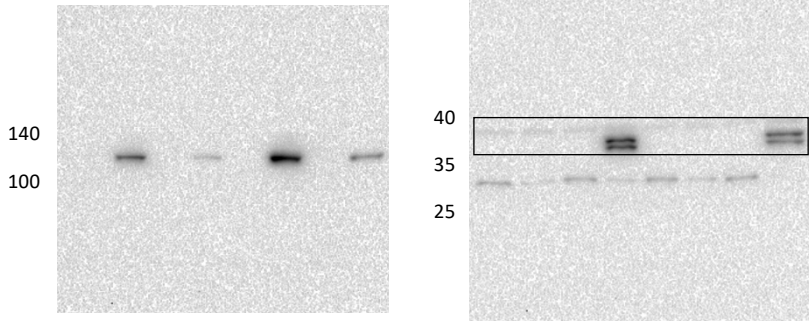

**iNOS**

**Arg1**

**C.**

|   |     |     |     |               |   |     |     |     |               |   |     |     |     |               |
|---|-----|-----|-----|---------------|---|-----|-----|-----|---------------|---|-----|-----|-----|---------------|
| 0 | 1:1 | 2:1 | 3:1 | <i>Cn:Mac</i> | 0 | 1:1 | 2:1 | 3:1 | <i>Cn:Mac</i> | 0 | 1:1 | 2:1 | 3:1 | <i>Cn:Mac</i> |
|---|-----|-----|-----|---------------|---|-----|-----|-----|---------------|---|-----|-----|-----|---------------|

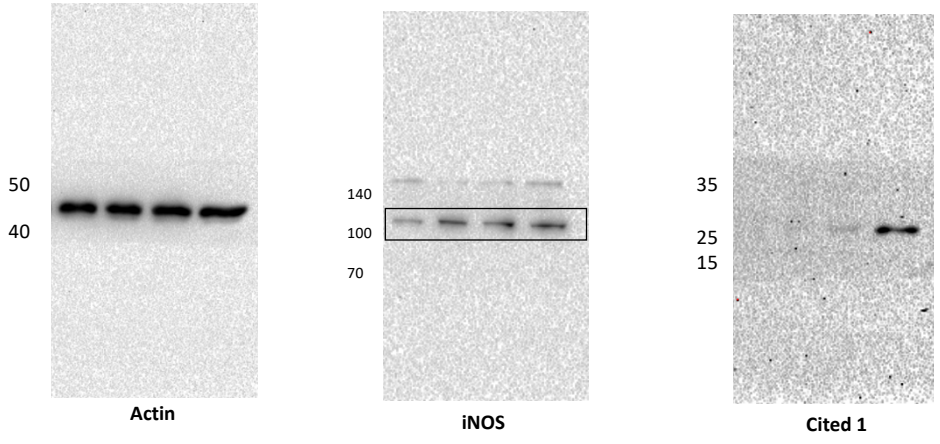

**Actin**

**iNOS**

**Cited 1**
